# Supplementary material for: Longnon-coding RNA BLACAT2 promotes gastric cancer progression via the miR-193b-5p/METTL3 pathway
Source: PubMed Central journal article supplement (PMC8100803; doi:10.7150/jca.50403), 2021-04-02
Supplement: jcav12p3209s1.pdf [file jcav12p3209s1.pdf]

### Supplementary Figure 1.

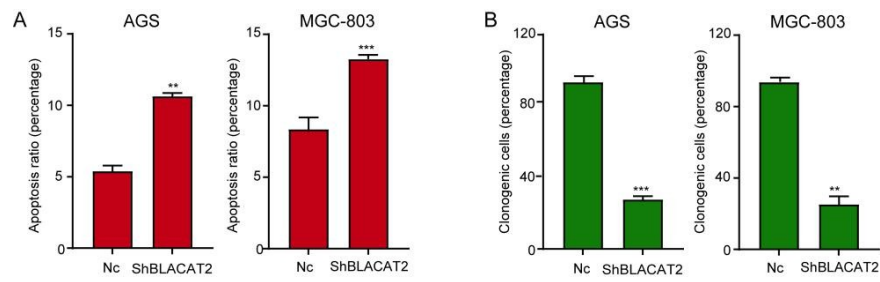

**A:** The statistical results of Figure 2C. **B:** The statistical results of Figure 2D.

(\*p < 0.05, \*\*p < 0.01 and \*\*\*p < 0.001).

## Supplementary Figure 2.

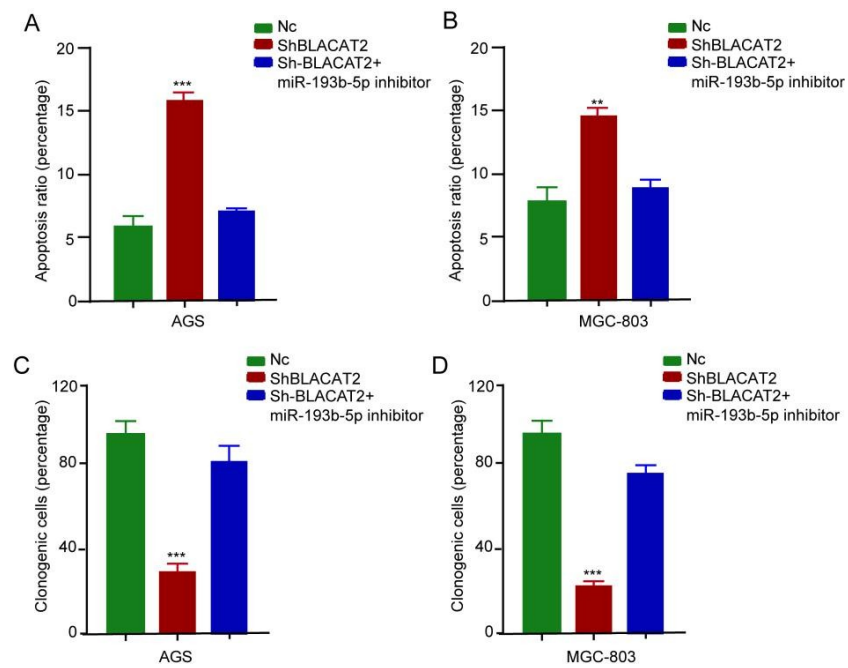

**A-B:** The statistical results of Figure 5B. **C-D:** The statistical results of Figure 5C. (\*p < 0.05, \*\*p < 0.01 and \*\*\*p < 0.001).

**Supplementary Figure 3.**

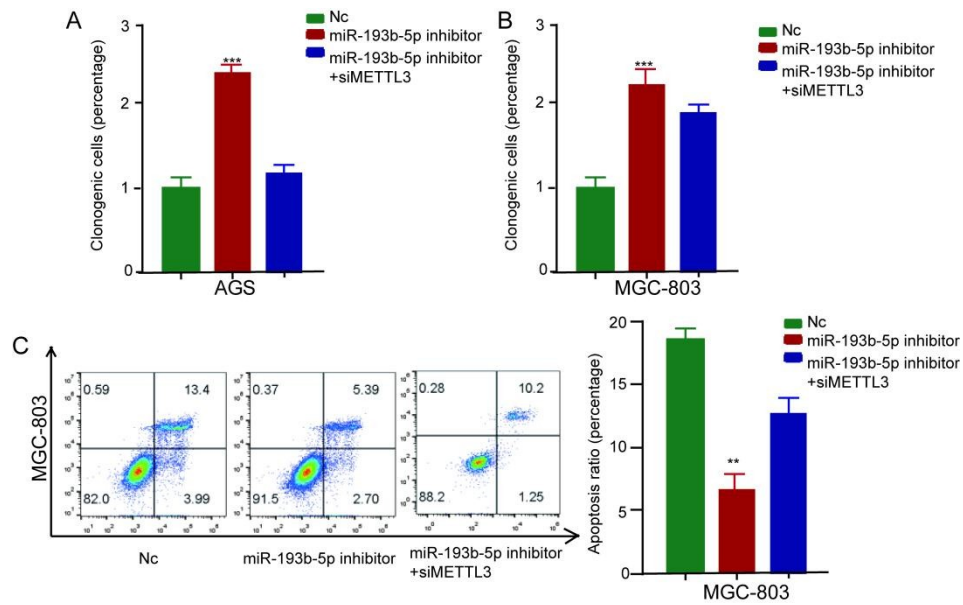

**A-B:** The statistical results of Figure 6G. **C:** Apoptosis flow cytometry experiments demonstrated that inhibition of miR-193b-5p suppressed cell apoptosis while inhibiting METTL3 partly reversed the effects. the statistical results were shown on the right. (\* $p < 0.05$ , \*\* $p < 0.01$  and \*\*\* $p < 0.001$ ).

### Supplementary Figure 4.

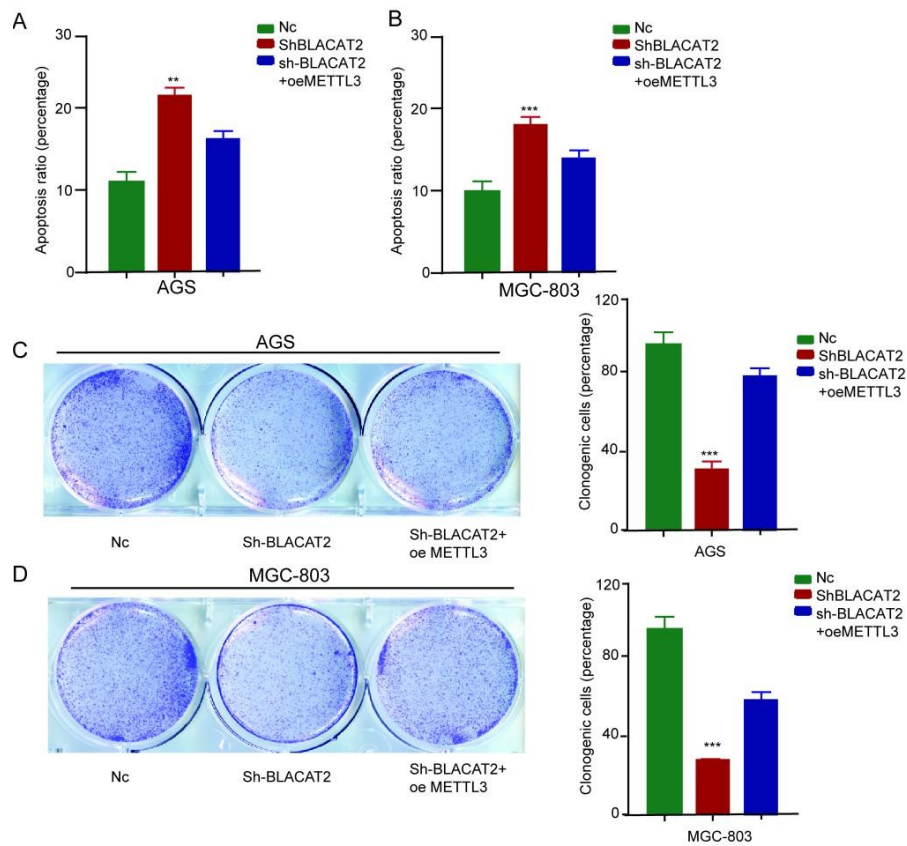

**A-B:** The statistical results of Figure 7D. **C-D:** Plate colony formation assay showed that METTL3 restoration partly reverses the suppressive effects of proliferation induced by BLACAT2-knockdown in both AGS and MGC-803 cells. the statistical results were shown on the right. (\* $p < 0.05$ , \*\* $p < 0.01$  and \*\*\* $p < 0.001$ ).

**Supplementary Figure 5. METTL3 expression was downregulated in BLACAT2 silencing xenograft tumor-bearing tissues.**

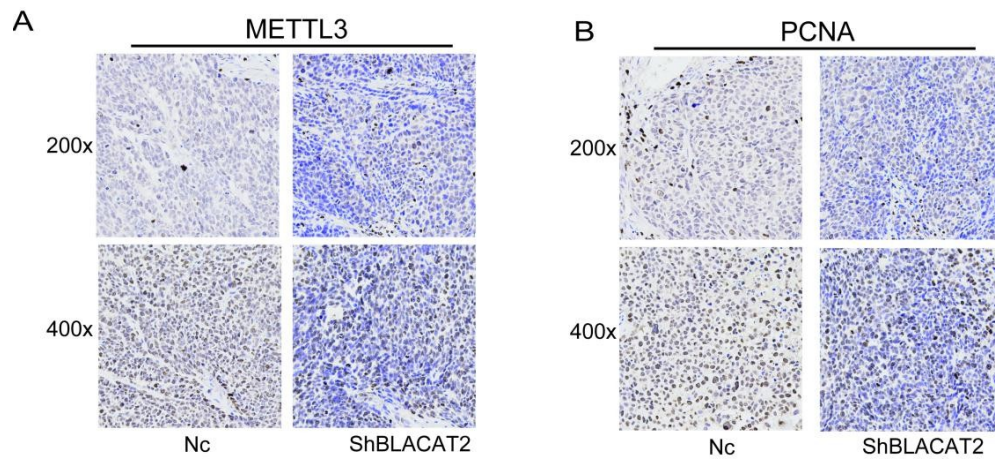

**A:** Decreased expression of METTL3 in tissues from AGS/shBLACAT2 was detected than Nc by IHC staining. **B:** Compared with Nc mice, PCNA expression was also down-regulated in BLACAT2 silencing tissues.
